# Supplementary material for: Tidal and Physicochemical Effects on Phytoplankton Community Variability at Tagus Estuary (Portugal)
Source: Frontiers journal article supplement (doi:10.3389/fmars.2021.675699), 2021-07-07
Supplement: Data_Sheet_1.XLSX [file Data_Sheet_1.XLSX]

## Sheet: Table sm 1
Table sm 2 - Water volumes filtered for each replicate used in the quantification of chlorophyll by spectofotometry (CHL 1, 2 and 3), suspended particullate matter (SPM 1, 2 and 3) and the quantification of phytoplankton pigments by HPLC (HPLC) for both Alcântara and Barreiro in each sampling event.
Location	Date	Chl1	Chl2	Chl3	SPM1	SPM2	SPM3	HPLC
Alcântara	2018-04-24	700	660	660	500	500	500	200
	2018-05-02	500	500	500	500	500	500	200
	2018-05-07	1000	1000	1000	500	500	500	500
	2018-05-17	1000	1000	1000	500	500	500	300
	2018-05-21	800	800	1000	1000	1000	500	300
	2018-05-29	1000	1000	1000	500	500	500	350
	2018-06-06	1000	1000	1000	500	500	500	500
	2018-06-19	500	500	500	400	400	400	200
	2018-06-29	1000	700	700	500	500	500	250
	2018-07-04	1000	1000	1000	500	500	500	500
	2018-07-13	500	500	500	500	500	500	250
	2018-07-18	1000	1000	500	500	500	500	500
	2018-07-30	500	500	500	500	500	500	215
	2018-08-06	1000	1000	1000	500	500	500	500
	2018-08-10	1000	1000	1000	500	500	500	500
	2018-08-20	1000	1000	1000	500	500	500	360
	2018-08-28	500	500	500	500	500	500	250
	2018-09-05	1000	1000	1000	500	500	500	500
	2018-09-10	750	750	750	500	500	500	250
	2018-10-02	1000	1000	1000	500	500	500	500
	2018-10-24	500	500	500	500	500	500	250
	2018-10-31	500	500	500	500	500	500	250
	2018-11-09	1000	1000	1000	500	500	500	250
	2018-11-15	1500	1500	1500	1000	1000	1000	500
	2018-11-22	1000	1000	1000	500	500	500	250
	2018-11-30	1000	1000	1000	500	500	500	500
	2018-12-17	500	500	500	500	500	500	200
	2018-12-22	1000	1000	1000	500	500	500	500
	2019-01-03	1000	1000	1000	1000	1000	1000	500
	2019-01-07	1000	1000	1000	500	500	500	500
	2019-01-14	1000	1000	1000	500	500	500	250
	2019-01-22	500	500	500	500	500	500	220
	2019-01-29	1000	1000	1000	500	500	500	500
	2019-02-04	1000	1000	1000	500	500	500	330
	2019-02-14	970	970	940	500	500	500	315
	2019-02-21	500	500	500	500	500	500	200
	2019-03-01	1000	1000	1000	500	500	500	500
	2019-03-06	500	500	500	500	500	500	310
	2019-03-14	500	500	500	500	500	500	280
	2019-03-20	1000	1000	1000	500	500	500	370
	2019-03-27	1000	1000	1000	1500	1500	1500	500
	2019-04-04	1000	1000	1000	600	600	600	500
	2019-04-11	700	700	700	500	500	500	415
	1900-04-18	500	500	500	500	500	500	250
Barreiro	2018-04-09	1000	1000	1000	500	500	500	500
	2018-04-16	1000	1000	1000	500	500	500	500
	2018-05-02	1000	1000	1000	500	500	500	400
	2018-05-07	1000	1000	1000	500	500	500	500
	2018-05-17	750	750	750	500	500	500	450
	2018-05-21	1000	1000	1000	500	500	500	500
	2018-05-29	1000	1000	1000	500	500	500	300
	2018-06-06	1000	1000	1000	500	500	500	500
	2018-06-11	1000	1000	1000	500	500	500	500
	2018-06-19	1000	1000	1000	500	500	500	420
	2018-06-29	1000	1000	1000	500	500	500	300
	2018-07-04	1000	1000	1000	500	500	500	500
	2018-07-13	250	1000	750	750	500	500	500
	2018-07-18	500	500	500	500	500	500	370
	2018-07-30	1000	1000	1000	500	500	500	320
	2018-08-06	1000	1000	1000	500	500	500	500
	2018-08-10	750	750	750	500	500	500	250
	2018-08-20	1000	1000	1000	500	500	500	500
	2018-08-28	500	500	500	500	500	500	250
	2018-09-05	1000	1000	1000	500	500	500	500
	2018-09-10	500	500	500	500	500	500	203
	2018-09-17	1000	1000	1000	500	500	500	250
	2018-09-28	1000	1000	1000	500	500	500	400
	2018-10-02	1000	1000	1000	500	500	500	500
	2018-10-10	1000	1000	1000	500	500	500	250
	2018-10-16	1000	1000	1000	500	500	500	250
	2018-10-24	1000	1000	1000	500	500	500	500
	2018-11-09	1000	1000	1000	500	500	500	500
	2018-11-22	1000	1000	1000	500	500	500	500
	2018-11-30	1000	1000	1000	500	500	500	500
	2018-12-07	1000	1000	1000	500	500	500	500
	2018-12-17	1500	1500	1500	1000	1000	1000	500
	2018-12-21	500	500	500	500	500	500	250
	2019-01-03	1200	1000	1000	500	500	500	500
	2019-01-07	1000	1000	1000	500	500	500	500
	2019-01-14	1000	1000	1000	1000	1000	1000	500
	2019-01-22	1000	1000	1000	500	500	500	330
	2019-01-29	1000	1000	1000	1000	1000	1000	500
	2019-02-04	1000	1000	1000	500	500	500	350
	2019-02-14	1000	1000	1000	1000	1000	1000	500
	2019-02-21	1000	1000	1000	500	500	500	250
	2019-03-01	1000	1000	1000	1000	1000	1000	500
	2019-03-06	1000	1000	1000	500	500	500	500
	2019-03-14	1000	1000	1000	1000	1000	1000	500
	2019-03-20	1000	1000	1000	500	500	500	405
	2019-03-27	1500	1500	1500	1500	1500	1500	500
	2019-04-03	1000	1000	1000	500	500	500	310
	2019-04-11	700	700	700	500	500	500	282
	2019-04-18	700	700	700	500	500	500	250

## Sheet: Table sm 2
Table sm 3 - Correlation and Concurvity (using worst estimate) between the several response variables used in the General Additive Model analysis. Correlations higher than 0.7 were considered as colinear and are marked in red. The variables in test are Secchi depth, air temperature (AT), water temperature (WT), pH, Salinity (Sal), tide height (TH), ammonia concentration, ortopHospHate concentrati…
Pearson Correlation
Alcântara																									Barreiro
	AT	WT	pH	Sal	TH	Ammonia	pHospHate	Silica	Nitrites	Nitrates	SPM	OM	IM	Kext	p1	p7	r1	r7	t1	t7	DIN	WTP	RD1	RD5		AT	WT	pH	Sal	TH	Ammonia	pHospHate	Silicates	Nitrites	Nitrates	SPM	OM	IM	Kext	p1	p7	r1	r7	t1	t7	DIN	RD
Secchi Depth	0.100807	-0.0576461	0.107599	-0.0372815	0.364091	-0.0167868	-0.047532	-0.129628	-0.0493215	0.0346205	-0.634963	-0.489616	-0.62376	-0.753342	-0.194695	-0.00478119	0.100941	0.184514	0.0608611	0.0146861	-0.00648285	-0.281342	-0.0326377	-0.185225	P Secchi	-0.230016	-0.197694	0.082776	0.0132814	0.0753223	-0.114844	-0.14503	-0.226168	-0.0926312	0.134939	-0.613245	-0.559936	-0.592723	-0.867158	-0.0372173	0.167465	-0.070702	-0.064982	-0.0943287	-0.189746	0.0391587	-0.251556
AT		0.678634	-0.164417	-0.131431	0.151017	0.0351787	0.0184674	0.00290333	-0.0451319	-0.124072	-0.202609	0.0126358	-0.217381	-0.286299	-0.160966	-0.181434	0.729234	0.788105	0.75018	0.76147	-0.00129261	-0.0922135	0.300698	0.311353	AT		0.811296	-0.256397	-0.00754358	0.0269146	-0.488436	-0.166609	-0.115769	-0.21372	-0.356068	0.0122302	0.24761	-0.0223172	0.223424	-0.275622	-0.237074	0.646043	0.764848	0.770543	0.79863	-0.461221	0.330617
WT			-0.190295	-0.149708	-0.0583121	-0.00274847	0.00355023	-0.0670284	-0.0661629	-0.151452	-0.104862	0.0768294	-0.120144	-0.113891	-0.168126	-0.198868	0.536317	0.699367	0.824259	0.804407	-0.0379728	0.0128784	0.530248	0.490955	WT			-0.230097	0.0821728	-0.0372261	-0.543091	-0.228565	-0.305809	-0.0964433	-0.324094	0.0707705	0.327626	0.030408	0.153242	-0.196838	-0.246368	0.507611	0.714107	0.885606	0.92519	-0.459553	0.375263
pH				0.0839333	0.238461	-0.17778	-0.336786	-0.0748969	-0.397144	-0.168423	-0.131989	-0.140072	-0.125499	-0.145269	-0.120098	-0.145575	-0.190101	-0.239575	-0.116228	-0.0432958	-0.187433	-0.296873	-0.0200774	0.138454	pH				-0.0903329	0.223398	0.0143908	-0.0470384	0.0700949	-0.167145	-0.0980891	-0.0111321	-0.0978949	0.00170113	-0.0673685	-0.0620663	0.0527585	0.0224722	-0.136393	-0.17487	-0.193128	-0.065723	-0.0475696
Sal					0.35803	-0.53326	-0.569035	-0.731714	-0.524151	-0.549604	0.268334	0.0488543	0.280771	0.133979	0.194434	-0.136961	-0.0746505	0.0250801	-0.101756	0.0549446	-0.557997	0.0562196	-0.0554264	-0.0786055	Sal					-0.148767	-0.117682	-0.214442	-0.600194	-0.240575	-0.287251	0.210894	0.18103	0.205665	-0.0556644	0.110112	-0.0173346	0.0474276	0.011705	0.124882	0.0814507	-0.254176	-0.441719
TH						-0.358291	-0.323387	-0.277468	-0.31819	-0.240295	-0.0474204	-0.197359	-0.0291144	-0.415334	0.171906	-0.0838538	-0.108255	0.0230029	0.0241856	0.127754	-0.344906	-0.0293915	-0.0554264	-0.0786055	TH						-0.108899	-0.339629	0.121088	-0.114532	0.0851347	0.120844	-0.0426723	0.138662	-0.00338388	0.128169	-0.0882282	-0.136444	-0.0423277	0.0234433	0.0225064	0.00714461	0.00719993
Ammonia							0.876759	0.599608	0.847048	0.791634	-0.0637198	0.272378	-0.097526	0.0606622	-0.0555262	0.355066	0.00618654	-0.0829435	-0.0775751	-0.178444	0.98922	0.0370445	0.23307	0.0962251	Ammonia							0.393466	0.470888	0.572213	0.513608	0.044314	-0.118553	0.0658403	0.0842099	0.171978	0.0912357	-0.522131	-0.633022	-0.594791	-0.489618	0.801762	-0.0235058
pHospHate								0.5965	0.953033	0.870102	-0.124313	0.238255	-0.158419	0.0153889	-0.0835119	0.400635	-0.0363747	-0.153069	-0.0890654	-0.155732	0.911776	0.0323102	0.19323	0.0486748	pHospHate								0.55125	0.436928	0.308578	-0.169202	-0.127373	-0.167499	0.0698248	-0.0839627	-0.172998	-0.12344	-0.224316	-0.309646	-0.285748	0.394541	0.193835
Silica									0.555017	0.603189	-0.1175	0.053624	-0.131096	0.0577629	-0.127494	0.207895	0.0465714	-0.186558	-0.121649	-0.232753	0.623328	0.0152521	0.380316	0.314616	Silicates									0.44742	0.519599	-0.137026	-0.241782	-0.115881	0.231882	-0.0669116	-0.112321	-0.159235	-0.235129	-0.348335	-0.28796	0.572201	0.379755
Nitrites										0.88404	-0.0910312	0.217781	-0.120712	0.0176423	-0.0477853	0.386017	-0.12657	-0.203442	-0.182335	-0.207942	0.892435	0.0900325	0.150592	0.0529373	Nitrites										0.651687	0.101681	-0.0335768	0.116404	0.121893	-0.0419356	-0.191942	-0.425744	-0.485006	-0.225876	-0.115428	0.723253	0.24196
Nitrates											-0.151682	0.175684	-0.1808	-0.0130898	-0.0289121	0.476055	-0.256414	-0.334002	-0.231792	-0.244137	0.872419	0.108885	0.152442	0.0502321	Nitrates											-0.0631322	-0.215567	-0.0385216	-0.0438459	0.100834	-0.0947331	-0.452051	-0.517709	-0.374102	-0.306016	0.924242	0.171554
SPM												0.640772	0.996515	0.550815	0.471502	0.0739485	-0.24388	-0.234724	-0.119823	-0.118735	-0.0868084	0.469163	-0.173825	-0.0762518	SPM												0.717062	-0.154957	0.0760157	0.0393744	-0.0885966	-0.0277521	-0.242091	-0.435787	-0.369976	0.924242	0.171554
OM													0.574503	0.30742	0.207808	0.125892	-0.0952152	-0.0767428	0.00629907	0.0140598	0.260098	0.469741	0.0860178	-0.0225287	OM													0.64331	0.579368	0.0107161	-0.064399	0.214132	0.199173	0.378139	0.282786	-0.199332	0.132082
IM														0.553842	0.480106	0.0651613	-0.249668	-0.241909	-0.128467	-0.128115	-0.120807	0.449155	-0.194264	-0.0788469	IM														0.766999	0.021552	-0.0713597	-0.139433	-0.171167	0.0375008	0.0332057	0.00595909	-0.025662
Kext															0.192098	-0.0430388	-0.184926	-0.262396	-0.147437	-0.12517	0.0454126	0.281443	-0.0173125	0.0664082	Kext															-0.0267923	-0.185392	0.0697101	0.0291271	0.112556	0.156123	0.0104803	0.25305
p1																0.208917	-0.210946	-0.165682	-0.199518	-0.229886	-0.0515287	0.360215	-0.182945	-0.0721665	p1																0.204413	-0.209932	-0.165087	-0.22581	-0.227166	0.14206	-0.0665306
p7																	-0.0296616	-0.162512	-0.204714	-0.321956	0.397325	0.0172711	-0.197396	-0.224724	p7																	-0.0351925	-0.160889	-0.237884	-0.313895	-0.0308327	-0.224657
r1																		0.837338	0.643051	0.493331	-0.0560672	-0.120456	0.10946	0.0873577	r1																		0.847691	0.55413	0.46369	-0.547327	0.0256508
r7																			0.759795	0.695311	-0.145817	-0.0868219	0.269672	0.255092	r7																			0.720329	0.678318	-0.642487	0.2385
t1																				0.876169	-0.117984	-0.210125	0.356641	0.322595	t1																				0.909211	-0.520067	0.248457
t7																					-0.20109	-0.156313	0.382373	0.423745	t7																					-0.424607	0.340091
DIN																						0.0559624	0.222308	0.0886864	DIN																						0.114111
WTP-D																							0.114076	0.0717099
RD1																								0.814568
Concurvity - worst estimate
Alcântara											Barreiro
	s(Tide Amplitude)	s(T_agua)	s(pH)	s(sal)	s(log(SiO))	s(log(DIN))	s(WTP)	s(log(RD5))	s(Tide Height)	s(log(A$SPM))		s(T_agua)	s(pH)	s(sal)	s(Tide Amplitude)	s(PO4)	s(log(SiO))	s(r1)	s(DIN)	s(log(RD5))	s(Tide Height)	s(SPM)
Parametric	2.36543e-31	4.7687e-31	1.12198e-32	4.85081e-31	1.92541e-32	5.89635e-31	4.0112e-30	2.61656e-32	4.14052e-32	5.94027e-32	para	1.08286e-32	1.21359e-30	3.17241e-31	5.80324e-31	1.89552e-32	3.45758e-31	4.28111e-32	6.8154e-32	1.24831e-32	1.79298e-32	2.94397e-33
s(Tide Amplitude)		0.0707721	0.0940573	0.324644	0.204583	0.123005	0.0543626	0.0516569	0.949181	0.561629	s(T_agua)		0.440657	0.00890792	0.0367579	0.158652	0.129358	0.282451	0.23448	0.239241	0.0731343	0.0303857
s(Water temperature)			0.534988	0.330651	0.136801	0.0440269	0.380307	0.280266	0.0911066	0.0119411	s(pH)			0.0963859	0.0336394	0.0622431	0.0329305	0.130285	0.052198	0.0286258	0.0572344	0.070189
s(pH)				0.0402972	0.101774	0.103895	0.283839	0.15825	0.0868734	0.0502181	s(sal)				0.101523	0.0396295	0.388821	0.0213365	0.186606	0.187054	0.104312	0.0673015
s(sal)					0.552797	0.259897	0.0299987	0.218678	0.580333	0.0885122	s(Tide Amplitude)					0.0514427	0.02977	0.0917923	0.0708881	0.0324532	0.957008	0.504702
s(log(SiO))						0.377301	0.010982	0.0375734	0.336271	0.102086	s(PO4)						0.380867	0.163433	0.480818	0.0618169	0.118901	0.0610617
s(log(DIN))							0.0550698	0.050641	0.309413	0.0253317	s(log(SiO))							0.105214	0.520284	0.123683	0.0302137	0.0265895
s(WTP)								0.0391086	0.0479046	0.2902	s(r1)								0.313155	0.10861	0.0184011	0.0204031
s(log(RD5))									0.016394	0.0335274	s(DIN)									0.0883626	0.0378739	0.0765804
s(Tide Height)										0.413234	s(log(RD5))										0.0288214	0.00312684
											s(Tide Height)											0.418736

## Sheet: Table sm 3
Table sm 1 - Raw data collected during the this work identifying the sampling site, coordinates of the sampling sites, date of the sampling, sampled tide and tide intensity, tide height, tide hour, sampling hour, secchi depth, Weather conditions, Air temperature (AT), water temperature (WT), pH, Salinity (Sal), parameters measured in field using an EXO 2 multiparameter probe (Chl by flurescence, …
Sampling site	Coordinates		Date	Tide	Tide Intensity	Tide Height (m)	Secchi depth	DO%	DO	Chl (ug/L)	Chl (std)	Phaeopigments (ug/L)	Phaeopigments (std)	Amonia (um/L)	Amonia (std)	Phosphates (ug/L)	Phosphates (std)	Silicate (um/L)	Silicate (std)	Nitrites (umol/L)	Nitrites (std)	Nitrates (umol/L)	Nitrates (std)	SPM (mg/L)	SPM (std)
	x DD	y DD
Alcântara	-9.17539	38.6978	2018-04-24	Low	Neap	1.5	0.5			1.24243	0.165535	0.942971	0.184847	160.363	10.3922	7.90731	1.81854	69.4311	6.21361	2.24581	0.771653	35.7672	2.95906	26.4667	1.81475
			2018-05-02	Low	Spring	0.9	1.25			1.4718	0.29436	1.54539	0.389402	75.9615	5.47655	3.56009	0.227608	20.6255	1.70896	1.83277	0.271419	15.291	2.47814	28.2667	6.30026
			2018-05-07	High	Neap	3	2			1.52086	0.224821	0.576455	0.266182	3.39744	0.448718	1.1853	0.0304775	26.7039	6.87426	0.547781	0.0402293	10.087	1.58904	6	0.6
			2018-05-17	High	Spring	4.1	1.25			5.74002	0.624432	3.16437	2.00626	32.2222	2.74994	1.30536	0.080901	3.61706	0.501255	0.398349	0.0507694	6.33107	1.98425	22.8	0.565685
			2018-05-21	Low	Neap	1.1	2	105	8.21	4.13331	0.654427	1.46873	0.380425	93.7284	4.68973	2.98297	0.911399	1.89728	0.263629	0.732519	0.140109	3.59028	1.11177	11	2.38118
			2018-05-29	Low	Spring	0.77	2.25			5.78908	0.473118	3.07852	0.405302	0.790598	0.302937	1.03226	0.372782	1.18333	0.318801	0.298133	0.100522	1.10033	0.45192	14.4667	1.17189
			2018-06-06	High	Neap	2.82	2.75	92.6	7.41	2.79642	0.254923	0.7359	0.0637308	8.26923	0.631337	1.11158	0.122813	2.55994	0.961369	0.471199	0.0164018	3.57483	0.370096	7.66667	1.36137
			2018-06-19	Low	Neap	1.05	0.75			2.50206	0.208144	1.58219	0.26018	203.095	18.2204	8.23641	0.492407	18.7452	2.50219	3.17465	0.0504035	6.484	0.994906	46.6667	14.165
			2018-06-29	Low	Spring	0.89	0.75			0.609746	0.0297349	4.30326	1.56784	94.4444	5.28033	4.50643	0.22859	17.9383	2.09932	4.93936	0.150774	31.2579	2.56735	28.8667	1.70098
			2018-07-04	High	Neap	3.06	1.5	84.5	6.51	1.56992	0.30638	1.04253	0.465909	5.9188	0.242688	1.14775	0.0555159	11.3659	0.413786	0.751397	0.100801	6.97096	1.5279	11.6667	0.986577
			2018-07-13	High	Spring	3.99	0.75	85.6	6.78	1.76616	0.416288	4.51352	2.01579	8.31197	0.426816	0.535965	0.0812538	4.4799	0.675928	0.331168	0.0217471	5.07548	1.2785	35.8667	12.7033
			2018-07-18	Low	Neap	0.91	1	82.5	6.29	2.06052	0.208144	2.33035	0.29741	0.235043	0.225121	1.53391	0.410549	32.6639	33.2381	0.728373	0.0418478	11.0202	0.0721401	14.3333	0.832666
			2018-07-30	Low	Spring	0.88	1.25	89.3	6.87	2.06052	1.60119e-15	7.40806	2.28761	34.8291	0.560057	3.05755	0.0840596	12.4171	2.73604	1.68061	0.189401	26.6052	2.57952	21.4	3.10483
			2018-08-06	High	Neap	3.07	2.25	105.1	7.9	4.26822	0.416288	7.46938	2.46856	15.7692	0.618183	1.57497	0.0782627	9.70728	0.430306	0.725446	0.0297728	14.6611	3.25209	7.26667	0.90185
			2018-08-10	High	Spring	3.9	2	66.6	7.17	5.59284	0.624432	5.12677	1.96959	0.705128	0.558833	0.513787	0.17757	3.71567	0.127997	0.30732	0.00819435	4.4148	0.305794	12.1333	0.416333
			2018-08-20	Low	Neap	1.51	1.75	105.4	7.89	4.4154	0.389402	5.07771	0.389402	147.628	1.28045	10.7615	0.0656229	14.2749	1.36906	3.39691	0.196499	62.8769	2.45233	10.8	0.2
			2018-08-28	Low	Spring	0.8	0.75			6.18156	0	3.6427	0.156108	1.23932	2.09325	0.415628	0.0351318	3.3725	0	0	0	2.42371	0.35304	29.0667	2.08167
			2018-09-05	High	Neap	3.21	2	91.1	6.92	0.9812	0.0849744	2.21996	0.276167	42.906	1.28419	2.25224	0.108047	9.23986	0.697423	1.43845	0.115334	28.0749	5.02151	8.2	0.69282
			2018-09-10	High	Spring	4.24	0.75	91.1	6.98	1.11203	0.113299	3.74491	0.113299	2.22222	0.259067	0.529696	0.215802	4.79053	0.389168	0.367906	0.0187243	6.72579	0.507613	41.1333	0.90185
			2018-10-02	High	Neap	3.2	2.25			0.9812	0.30638	1.26329	0.536164	7.82051	0.0641026	1.02078	0.010611	10.6263	1.13797	0.640562	0.0473071	14.6621	0.65204	9.06667	0.305505
			2018-10-24	Low	Spring	0.8	0.5			4.21916	0.449642	3.80215	0.552334	49.4658	2.14752	3.73639	0.0916921	10.7044	1.17974	1.62143	0.100884	22.1306	1.15031	36.8	3.1749
			2018-10-31	High	Neap	1.3	1	83	6.82	0.78496	0.0849744	1.37368	0.339898	47.6282	3.65385	3.39657	0.341833	13.916	1.70963	1.76504	0.202556	31.8718	3.87886	34.7333	2.41109
			2018-11-09	High	Spring	3.9	0.75	90.4	7.35	0.93214	0.0849744	3.55685	0.148705	3.88889	0.450242	0.7931	0.16958	6.49256	0.36842	0.669285	0.00790496	10.8132	0.209429	65.3333	1.44684
			2018-11-15	Low	Neap	1.6	1.5	90.6	7.88	0.752253	0.113299	0.964847	0.198274	12.1581	0.0370096	2.05429	0.14964	17.1859	0	0.972964	0.109139	26.0868	4.28123	8.13333	1.24231
			2018-11-22	Low	Spring	0.8	0.25			0.63778	0.0849744	2.26902	0.30638	98.2479	10.5193	7.48408	0.20862	20.1687	1.9614	3.59007	0.37546	51.7465	3.3661	29.0667	0.986577
			2018-11-30	High	Neap	3.4	1.5	90	7.52	0.63778	0.0849744	1.16518	0.0212436	35.9615	1.94538	2.59456	0.00994697	18.8821	0.715142	2.01918	0.251562	39.5938	5.5871	21.8667	4.88399
			2018-12-17	Low	Neap	1.3	1.5			0.51513	0.104072	0.349553	0.182126	344.444	30.5167	27.3537	0.381479	47.6025	5.9947	12.0563	0.3025	113.688	2.60922	13.6	3.51568
			2018-12-22	Low	Spring	0.8	1	93.3	7.88	1.07932	0.169949	0.7359	0.052036	6.62393	1.04417	1.22675	0.210712	8.68271	0.556434	0.746691	0.0487266	15.2599	1.92485	24.3333	4.10528
			2019-01-03	High	Neap	3.3	1.75	91.8	7.74	0.58872	3.14018e-16	0.95667	0.156108	49.5299	0.481125	1.55805	0.0513195	13.492	0.736294	1.55631	0.0429927	14.9924	4.52493	17.6667	3.40196
			2019-01-07	High	Spring	3.4	1.5	93.3	7.86	1.10385	0.312216	1.06706	0.665369	16.0256	0.9245	1.94136	0.0286195	10.8167	1.23534	0.801164	0.012614	14.465	0.636043	12.6	0.6
			2019-01-14	Low	Neap	1.3	2.75	97	8.95	1.03026	0.14718	0.51513	0.160386	182.799	9.70754	6.13314	0.210601	36.7977	2.06773	3.29804	0.0786076	63.9643	7.01154	8.26667	0.46188
			2019-01-22	Low	Spring	0.3	0.4	94.3	8.21	1.61898	0.208144	4.78335	0.728504	8.61111	1.86486	0.983718	0.0348067	17.9926	0.527845	0.654411	0.0146239	1.31253	0.279393	84.9333	12.6512
			2019-01-29	High	Neap	3	1.5			0.4906	0.0849744	0.429275	0.12922	15.235	0.386392	1.41862	0.141855	19.7715	0.208543	0.681789	0.0391231	13.9046	0.0900199	15.6667	1.10151
			2019-02-04	High	Spring	3.3	1	94.9	8.08	0.51513	0.104072	1.87655	0.760331	11.047	0.296077	1.40094	0.152556	12.4309	2.56549	0.639671	0.00664913	10.6186	0.271987	25.2	3.1241
			2019-02-14	Low	Neap	1.3	2	91	7.8	0.531062	0.107291	0.436229	0.0268227	251.474	20.7741	9.50451	0.272352	26.2118	0.594002	4.69992	0.0968897	58.5376	11.3332	13.4667	1.00664
			2019-02-21	Low	Spring	0.2	0.25	91.3	7.765	1.4718	0.29436	3.31155	0.194701	10.9615	1.17677	1.00478	0.0102049	11.4428	0.587987	0.743441	0.0970393	10.0944	1.64657	31.9	4.94975
			2019-03-01	High	Neap	2.8	3	99.4	8.4	1.2265	0.0849744	0.53966	0.0562053	65.8547	3.66246	2.83322	0.0167297	15.3084	0.305516	2.38739	0.136199	28.2385	3.88247	5.23333	0.152753
			2019-03-06	High	Spring	3.5	0.5	98.4	8.1	1.76616	0.416288	3.11531	1.09234	22.7564	0.40032	1.1771	0.017184	5.44925	1.0794	1.21095	0.0669544	23.2598	2.06984	118.8	10.1823
			2019-03-14	Low	Neap	1.4	1.25	95	7.84	0.88308	4.00297e-16	0.88308	0.624432	40.1709	0.875025	9.57102	0.182734	19.6552	1.01801	4.30857	0.122142	33.0521	1.49465	9.53333	2.68576
			2019-03-20	Low	Spring	0.3	1	98.1	8.06	5.78908	0.30638	1.49633	0.786013	31.8803	2.03755	1.70145	0.0234465	8.95192	10.2119	1.27279	0.144049	12.7639	1.26576	18.8667	1.6773
			2019-03-27	High	Neap	3	3.25	99.4	8.09	2.25676	0.224821	0.9812	0.670773	1.08974	0.222058	0.609311	0.224801	0.44375	0.0753069	0.272048	0.0396204	5.43817	0.149093	5.8	0.371184
			2019-04-04	High	Spring	3.7	3	101.5	8.17	2.2077	0.208144	3.16437	1.36141	34.2735	1.32047	2.58369	0.0617295	6.69767	3.57588	1.27656	0.304985	12.746	1.86966	16.4444	0.254588
			2019-04-11	Low	Neap	1.2	1	95.1	7.75	1.40171	0.121392	1.2265	0.030348	67.2222	2.19951	6.16968	0.0499672	13.3243	3.64749	3.399	0.108628	31.731	3.85546	24	4.52106
			1900-04-18	Low	Spring	0.4	0.25			2.9436	0	5.37207	0.104072	139.167	8.27668	4.51044	0.0868712	6.47086	0.935251	2.10461	0.580998	19.7821	5.70711	49.1333	1.22202
Barreiro	-9.05832	38.6839	2018-04-09	Cheia	Morta	2.9	0.875			1.03026	0	0.44154	0.0637308	10.5983	0.328949	2.34918	0.167067	43.1325	4.35629	0.817888	0.0692723	19.7241	5.43502	8.46667	0.503322
			2018-04-16	Cheia	Viva	4.1	1			1.17744	0.208144	0.76043	0.112411	10.8333	0.389921	1.97867	0.0740623	50.9326	9.63971	1.02789	0.199638	22.87	3.60652	15	0.6
			2018-05-02	Vazia	Viva	0.9	1			2.15864	0.169949	0.600985	0.0925987	11.5598	0.0740193	1.78799	0.0793102	41.8831	5.57388	0.908666	0.0548159	17.1796	2.02465	14.1333	0.64291
			2018-05-07	Cheia	Morta	3	1.75			2.13411	0.104072	1.04253	0.639782	4.1453	0.934081	1.85262	0.508488	28.6288	10.1571	0.653295	0.0468871	8.31307	0.61159	4.86667	0.416333
			2018-05-17	Cheia	Viva	4.1	2			6.14885	0.299762	1.84793	0.471419	-1.00427	0.161321	1.13744	0.607316	1.13206	0.0651729	0.00239822	0.00415384	1.26942	0.652043	16.9	3.81838
			2018-05-21	Vazia	Morta	1.1	1.75	112.9	8.41	3.60591	0.312216	1.50859	0.674463	0.534188	0.322642	2.78273	0.571216	9.27733	0.103161	0.350377	0.0379212	1.56411	0.79375	7.26667	1.33167
			2018-05-29	vazia	viva	0.77	1.25			5.66643	0.936648	4.26822	2.59581	-0.470085	0.225121	1.41375	0.163503	1.30167	0.189333	0.258101	0.0262068	4.97028	0.897072	20.4	1.249
			2018-06-06	cheia	morta	2.82	1.75	92.4	7.29	1.56992	0.370395	0.674575	0.0765949	4.2735	0.545186	1.15411	0.183146	2.89917	0.0167349	0.454408	0.0368959	8.09343	1.88567	5.4	0.52915
			2018-06-11	Cheia	Viva	3.53	1.75	92.4	7.26	3.77762	0.339898	1.07932	0.224821	1.96581	0.161321	1.42274	0.352662	4.91478	0.762707	0.617968	0.0198449	6.13221	0.498504	7.73333	0.305505
			2018-06-19	Vazia	morta	1.05	1			7.65336	0.208144	1.41047	0.295126	7.30769	1.03163	2.0359	0.829001	9.44793	1.16325	0.866531	0.0686994	8.40855	0.655294	29.0667	16.9403
			2018-06-29	Vazia	Viva	0.89	0.85			0.88308	0.208144	5.93626	0.847351	6.49573	0.648461	1.81103	0.101002	17.323	0.626932	0.915151	0.0529323	18.3036	0.579915	17.6	0.72111
			2018-07-04	Morta	Cheia	3.06	1.625	85.1	6.51	1.10385	0.104072	4.40314	1.3253	8.82479	0.31621	1.7587	0.0829943	17.0785	1.56755	1.15829	0.0504585	8.25071	1.22088	14.2667	1.40475
			2018-07-13	Cheia	Viva	3.99	1	90	7.3	1.15641	0.148674	1.75298	1.5196	8.78205	0.65057	1.17517	0.16424	22.0504	0.333129	0.654588	0.0150921	8.88505	0.907463	19	2.25389
			2018-07-18	Vazia	Morta	0.91	0.85	94	6.88	2.2077	0.208144	7.67789	1.81505	3.26923	0.231125	1.77308	0.136642	19.096	1.38861	0.96287	0.033041	19.458	1.23276	23.4	0.916515
			2018-07-30	Vazia	Viva	0.88	1.25	91.4	6.75	3.31155	0.312216	7.73922	0.594821	3.01282	0.40032	1.37247	0.0563016	11.0208	0.642642	0.871856	0.0225514	4.88033	0.688155	15	0.34641
			2018-08-06	Cheia	Morta	3.07	2.125	133.1	9.56	9.41952	1.24886	7.49391	2.19056	0.0641026	0.206061	0.724285	0.0254675	5.30686	0.26297	0.493793	0.0427689	3.05162	1.16048	7.4	0.6
			2018-08-10	Cheia	Viva	3.9	1.25	117.5	8.66	11.2838	2.08144	6.03438	1.1101	1.66667	1.55968	0.77803	0.0467715	7.91926	0.502361	0.461027	0.0232459	6.35525	1.82999	18.0667	2.08167
			2018-08-20	Vazia	Morta	1.51	1.62	122.9	7.77	3.75309	3.75309	6.23675	2.57578	1.43162	0.0979183	0.64817	0.0198064	2.63094	0.211791	0	0	0.875107	0.487576	12	2.62298
			2018-08-28	Vazia	Viva	0.8	1			3.53232	0.29436	1.61898	0.208144	5.59829	0.609255	1.21102	0.11851	1984.11	28.7509	0.561255	0.0350032	5.41965	0.268551	19.4	0.72111
			2018-09-05	Cheia	Morta	3.21	1.75	92.3	6.85	1.91334	0.254923	1.91334	0.331155	8.54701	0.391673	1.30125	0.00841359	13.7464	1.2658	1.09635	0.05534	15.928	0.445826	11.4667	0.23094
			2018-09-10	cheia	viva	4.24	0.5	87.5	6.55	2.15864	0.679795	6.15703	6.15703	5.8547	0.537596	1.07288	0.063631	10.0347	0.570583	0.87853	0.122772	13.9255	1.58605	77.3333	1.1547
			2018-09-17	Vazia	Morta	1.6	2.25	87.1	6.38	1.76616	0.29436	5.22489	5.22489	9.05983	0.522085	1.90484	0.227541	17.7323	0.100409	1.24811	0.260249	23.7702	2.94103	4.93333	1.28582
			2018-09-28	vazia	viva	0.8	1.5			1.81522	0.224821	3.07852	3.07852	7.20085	0.783346	1.63835	0.0235575	13.1107	1.53253	0.639396	0.373478	16.2	3.11735	11.1333	0.11547
			2018-10-02	Cheia	Morta	3.2	1.5			1.98693	0.312216	2.23223	2.23223	8.20513	0.40032	1.64754	0.057558	14.3079	2.47696	1.00243	0.112551	18.5144	1.63841	17	1.0583
			2018-10-10	Cheia	Viva	4.1	1	87.1	6.65	1.86428	0.557214	2.6615	2.6615	4.87179	0.0641026	1.25917	0.203601	12.1242	2.1558	0.789339	0.099692	13.9077	3.25507	26.9333	3.00222
			2018-10-16	Vazia	morta	1.63	1.5			1.17744	0.208144	1.58218	0.990052	6.92308	0	1.69023	0.226475	13.1508	1.83139	1.16141	0.218935	13.0267	1.49773	12	1.0583
			2018-10-24	Vazia	viva	0.8	1.5			2.72283	0.312216	1.38594	0.730669	6.6453	0.806606	1.92688	0.344961	13.9732	0.705358	1.29255	0.0786521	9.83716	0.370145	14.0667	2.0232
			2018-11-09	Cheia	Viva	3.8	1	87.7		1.07932	0.0849744	2.85774	0.648191	8.95299	0.497914	1.44593	0.110417	14.274	0.684143	1.11274	0.0823314	16.7145	2.75213	49.2667	13.9231
			2018-11-22	Vazia	Viva	0.8	2			1.4718	0.416288	1.31235	0.406969	13.1197	0.751213	1.80526	0.0261593	12.851	0.256267	1.45744	0.0553429	20.7685	2.16994	17.1333	2.68576
			2018-11-30	Cheia	Morta	3.4	2	91.8	7.91	1.17744	0	0.7359	0.354838	10.7479	0.533761	1.81306	0.307225	15.7048	2.0185	0.754909	0.643103	21.3791	1.38035	10.5333	1.85831
			2018-12-07	Cheia	Viva	3.6	1	92.6	7.83	0.88308	0.208144	1.42274	0.321474	7.37179	0.508798	1.35423	0.0547183	16.1446	1.19565	0.959967	0.0812851	17.5191	2.40663	21.4667	0.11547
			2018-12-17	Vazia	Morta	1.3	2.5			1.32462	0	0.404745	0.168616	10.8974	0.524702	1.62108	0.15239	19.0931	1.3097	1.1347	0.088329	25.3268	2.09198	6.1	0.556776
			2018-12-21	Vazia	Viva	0.8	1.5	92.8	7.98	1.32462	0.208144	1.21424	0.52036	11.1111	1.46784	1.84273	0.182068	13.8716	0.43929	0.933161	0.0642472	16.625	5.55317	29.1333	3.82797
			2019-01-03	Cheia	Morta	3.3	2	94.3	8.39	0.61325	0	2.14638	#DIV/0!	9.76496	0.816731	1.48458	0.0720915	18.1642	0.856119	0.834786	0.0375001	18.5331	1.78309	12.3333	3.82797
			2019-01-07	Cheia	Viva	3.4	1.75	95.7	8.49	1.03026	4.96507e-16	0.34342	0.244993	8.18376	0.791176	1.49129	0.102194	16.1604	0.535036	0.80316	0.0158694	18.6634	2.76982	8.53333	1.1547
			2019-01-14	Vazia	Morta	1.3	2.5	105.6	9.45	0.80949	0.104072	0.625515	0.26018	8.03419	0.185048	1.38908	0.0359074	21.5465	0.272445	0.809929	0.0119162	20.7951	0.401253	6.73333	0.832666
			2019-01-22	Vazia	Viva	0.3	0.75	96.3	8.78	1.81522	0.0849744	1.90108	0.185197	10	0.293755	2.08108	0.0960345	26.8203	0.694975	0.902773	0.026304	2.21088	0.854216	25.8	4.34051
			2019-01-29	Cheia	Morta	3	2			1.39821	0.104072	1.17744	0.954545	7.71368	0.0740193	2.13652	0.371338	28.2698	0.37959	0.652798	0.0119061	14.4769	0.339878	3.93333	1.00664
			2019-02-04	Cheia	Viva	3.3	1.25	97.3	8.57	0.88308	3.14018e-16	0.68684	0.148705	20.8761	0.545186	1.77291	0.191558	24.5601	0.75731	0.829398	0.134689	12.44	2.03865	14.5333	2.30072
			2019-02-14	Vazia	Morta	1.3	2	103.9	8.83	1.03026	0.14718	0.44154	0.160386	14.8291	0.560057	1.82672	0.126151	13.8746	3.3892	0.91104	0.19657	12.587	2.19294	6.53333	0.23094
			2019-02-21	Vazia	Viva	0.2	1	92.5	7.91	1.66804	0.169949	1.12838	0.0765949	10.5983	0.737412	1.78095	0.105332	10.4291	1.97448	0.576417	0.491019	12.6204	1.12797	25.9333	0.23094
			2019-03-01	Cheia	Morta	2.8	3	102.1	8.57	0.551925	0.07359	0.566643	0.17761	7.60684	0.353049	1.52185	0.0408206	14.0935	1.06159	0.849736	0.0740804	19.8417	3.73533	4.76667	0.251661
			2019-03-06	Cheia	Viva	3.5	1.5	99.1	8.11	1.10385	0.104072	1.87655	0.26018	9.82906	0.605874	1.20685	0.0438549	7.37019	0.635659	0.604512	0.532195	15.2976	1.08909	25	0.52915
			2019-03-14	Vazia	Morta	1.4	2	104.5	8.57	1.7171	0.0849744	0.26983	0.0849744	7.79915	0.426816	1.57593	0.0607255	8.094	0.994493	0.645193	0.0313064	14.8597	1.09036	6.56667	0.305505
			2019-03-20	Vazia	Viva	0.3	1.5	102.5	8.43	3.13984	0.224821	0.83402	0.185197	5.87607	0.148039	1.24929	0.0338478	5.49658	1.76837	0.612497	0.0296878	11.2926	0.831056	15.7333	1.52753
			2019-03-27	Cheia	Morta	3	3.5	99	8.01	1.37368	0.19624	0.71137	0.218027	2.41453	0.161321	0.858254	0.0129804	1.86375	0.0753069	0.409457	0.0885303	8.44085	0.736837	5.62222	0.73131
			2019-04-03	Cheia	viva	3.7	1.5	103.3	8.18	1.91334	0.208144	1.4534	0.182126	5	0.678398	1.0282	0.0121418	7.78239	8.00429	0.378923	0.0726346	4.75382	1.13749	23.2667	0.46188
			2019-04-11	Vazia	Morta	1.2	1.5	98.5	8	1.82223	0.529136	1.64701	0.394524	8.91026	0.713816	1.45147	0.0688656	3.1595	0.443395	0.652581	0.0563327	5.2321	0.496884	25.4667	2.15716
			2019-04-18	Vazia	Viva	0.4	1			2.31283	0.892046	2.41796	1.33807	14.1026	1.15563	1.47452	0.0571727	5.56956	0.551532	0.693836	0.186775	5.27622	1.52731	23.7333	0.702377

## Sheet: Table sm 4
Table sm 5 - nutrient ratio for Alcântara and Barreiro sampling events compared with redfield ratios, being marked in red if under it. Nitrogen/phosphate ratio named as N:P is marked in red when under 16, and silicate/phosphate ratio, named as Si:P ratio, also marked in red when under 16.
Alcântara			Barreiro
Date	N:P	Si:P	Date	N:P	Si:P
2018-04-24	25.0877	8.78062	2018-04-09	13.2558	18.3607
2018-05-02	26.1469	5.79353	2018-04-16	17.5528	25.7409
2018-05-07	11.8385	22.5293	2018-05-02	16.5818	23.4247
2018-05-17	29.8399	2.77093	2018-05-07	7.07738	15.4532
2018-05-21	32.8703	0.636036	2018-05-17	0.235213	0.995262
2018-05-29	2.12064	1.14635	2018-05-21	0.879956	3.3339
2018-06-06	11.0791	2.30298	2018-05-29	3.36573	0.920719
2018-06-19	25.8308	2.27589	2018-06-06	11.1093	2.51204
2018-06-29	28.9901	3.98062	2018-06-11	6.12622	3.45446
2018-07-04	11.8852	9.90282	2018-06-19	8.14518	4.64067
2018-07-13	25.5961	8.35858	2018-06-29	14.1988	9.56528
2018-07-18	7.8125	21.2946	2018-07-04	10.3678	9.71085
2018-07-30	20.6423	4.06114	2018-07-13	15.5907	18.7636
2018-08-06	19.7818	6.16347	2018-07-18	13.361	10.77
2018-08-10	10.5632	7.23191	2018-07-30	6.38629	8.02986
2018-08-20	19.8766	1.32648	2018-08-06	4.98356	7.32703
2018-08-28	8.81324	8.11423	2018-08-10	10.9031	10.1786
2018-09-05	32.1544	4.10252	2018-08-20	3.55883	4.05903
2018-09-10	17.5873	9.04391	2018-08-28	9.56149	2.78483
2018-10-02	22.6526	10.41	2018-09-05	19.6513	10.564
2018-10-24	19.5959	2.86492	2018-09-10	19.2554	9.35302
2018-10-31	23.9256	4.09707	2018-09-17	17.8903	9.30907
2018-11-09	19.3814	8.18631	2018-09-28	14.6734	8.00239
2018-11-15	19.0907	8.36589	2018-10-02	16.8263	8.68445
2018-11-22	20.5215	2.69488	2018-10-10	15.541	9.62877
2018-11-30	29.8989	7.27755	2018-10-16	12.4902	7.78049
2018-12-17	17.1892	1.74026	2018-10-24	9.22476	7.25172
2018-12-22	18.4475	7.07779	2018-11-09	18.5211	9.87184
2019-01-03	42.4111	8.65952	2018-11-22	19.5792	7.11862
2019-01-07	16.1185	5.57169	2018-11-30	18.1361	8.66204
2019-01-14	40.7722	5.99982	2018-12-07	19.089	11.9216
2019-01-22	10.7531	18.2904	2018-12-17	23.0456	11.778
2019-01-29	21.0214	13.9371	2018-12-21	15.558	7.52776
2019-02-04	15.9216	8.87326	2019-01-03	19.6237	12.2352
2019-02-14	33.1118	2.75783	2019-01-07	18.5412	10.8365
2019-02-21	21.6956	11.3884	2019-01-14	21.3374	15.5114
2019-03-01	34.0533	5.40318	2019-01-22	6.30138	12.8877
2019-03-06	40.1215	4.62938	2019-01-29	10.6919	13.2317
2019-03-14	8.10067	2.05361	2019-02-04	19.2596	13.853
2019-03-20	26.987	5.26134	2019-02-14	15.5071	7.59536
2019-03-27	11.1601	0.728282	2019-02-21	13.3609	5.85593
2020-04-03	18.6927	2.59229	2020-03-01	18.5946	9.26074
2019-04-11	16.5895	2.15965	2019-04-03	9.85485	7.56895
2019-04-18	35.7068	1.43464	2019-03-06	21.321	6.10697
			2019-03-14	14.7874	5.136
			2019-03-20	14.2331	4.39978
			2019-03-27	13.1253	2.17156
			2019-04-11	10.1931	2.17676
			2019-04-18	13.613	3.77719

## Sheet: Table sm 5
Table sm 5 - Generalized Additive Model statistics for Chl a concentrations and community relative composition for Alcântara and Barreiro. Descriptors are Tidal amplitude, water temperature, pH, salinity (Sal), silicates concentration (SiO), dissolved inorganic nitrogen concentration (DIN) (being the last two logarithmized in Alcântara but not in Barreiro) and River Discharge in the last 5 days (…
Alcântara					Barreiro
Chl
Parametric coefficients:					Parametric coefficients:
	Estimate	Std. Error	t value	Pr(>|t|)		Estimate	Std. Error	t value	Pr(>|t|)
(Intercept)	2.095	0.1742	12.03	5.26e-14	(Intercept)	2.3458	0.1758	13.34	2.67e-16
Approximate significance of smooth terms:					Approximate significance of smooth terms:
	edf	Ref.df	F	p-value		edf	Ref.df	F	p-value
s(Tide Amplitude)	0.831859	2	2.164	0.025007	s(Tide Amplitude)	0.9524	2	4.067	0.005153
s(Water Temperature)	1.54454	2	4.281	0.006697	s(Water Temperature)	0.9947	2	9.797	4.78e-05
s(ph)	0.643683	2	1.151	0.054676	s(ph)	1.804	2	8.338	0.000419
s(sal)	0.99999	2	2.108	0.038022	s(sal)	0.8579	2	1.925	0.037604
s(log(SiO))	1.67904	2	7.247	0.000494	s(PO4)	1.34e-05	2	0	0.428989
s(log(DIN))	1.20625	2	2.488	0.025737	s(SiO)	1	2	10.44	3.24e-05
s(WTD)	0.0008423	2	0	0.319798	s(R1)	1.659	2	7.191	0.000698
s(log(RD5))	0.999999	2	4.426	0.003939	s(DIN)	2.228e-06	2	0	0.927311
R-sq.(adj) = 0.541	Deviance explained =62.6%				s(log(RD5))	0.7952	2	1.653	0.045466
GACV = 1.605	Scale est. = 1.3348			n=44	s(log(SPM))	3.429e-06	2	0	0.938487
					R-sq.(adj)=0.655	Deviance explained=71.30%
					GACV=1.7955	Scale est.=1.5152			n=43
Diatom
Parametric coefficients:					Parametric coefficients:
	Estimate	Std. Error	z value	Pr(>|z|)		Estimate	Std. Error	z value	Pr(>|z|)
(Intercept)	0.76532	0.01431	53.47	<2e-16	(Intercept)	0.51361	0.01473	34.87	<2e-16
Approximate significance of smooth terms:					Approximate significance of smooth terms:
	edf	Ref.df	Chi.sq	p-value		edf	Ref.df	Chi.sq	p-value
s(Tide Amplitude)	0.9232	2	11.878	0.00028	s(Water Temperature)	2.63e-06	2	0	1
s(Water Temperature)	1.246	2	4.207	0.03021	s(ph)	1.518	2	21.68	8.97e-07
s(sal)	9.729e-06	2	0	1	s(sal)	0.8692	2	6.99	0.00375
s(ph)	0.7844	2	3.912	0.02154	s(Tide Amplitude)	0.9476	2	18.791	5.93e-06
s(log(DIN))	0.6489	2	1.92	0.07685	s(PO4)	1.73	2	44.995	2.79e-12
s(WTD)	0.8465	2	5.549	0.00969	s(log(SiO))	1.059e-05	2	0	0.91222
s(log(SiO))	0.9195	2	12.747	4.36e-05	s(R1)	1.582	2	8.042	0.00555
s(log(RD5))	1.091	2	12.741	7.65e-05	s(DIN)	0.9367	2	16.104	2.11e-05
R-sq.(adj)=0.557	Deviance explained=67.80%				s(log(RD5))	0.8848	2	8.11	0.00184
-REML=-32.406	Scale est.=1			n=42	s(log(SPM))	7.214e-06	2	0	0.81409
					R-sq.(adj)=0.739		Deviance explained =82.7%
					-REML=-27.355		Scale est.=1		n=47
Cryptophytes
Parametric coefficients:					Parametric coefficients:
	Estimate	Std. Error	z value	Pr(>|z|)		Estimate	Std. Error	z value	Pr(>|z|)
(Intercept)	0.08032	0.00606	13.25	<2e-16	(Intercept)	0.33227	0.01192	27.87	<2e-16
Approximate significance of smooth terms:					Approximate significance of smooth terms:
	edf	Ref.df	Chi.sq	p-value		edf	Ref.df	Chi.sq	p-value
s(Tide Amplitude)	0.8065	2	4.105	0.02364	s(Water Temperature)	2.613e-05	2	0	0.43851
s(Water Temperature)	0.9343	2	14.687	5.21e-05	s(ph)	1.738	2	19.789	8.39e-06
s(sal)	1.642e-06	2	0	1	s(sal)	0.8454	2	5.67	0.00852
s(ph)	2.796e-06	2	0	1	s(Tide Amplitude)	0.8612	2	6.322	0.00578
s(log(DIN))	0.821	2	4.933	0.01242	s(PO4)	1.687	2	42.589	1.14e-11
s(WTD)	3.779e-06	2	0	0.64286	s(log(SiO))	2.584e-06	2	0	0.48449
s(log(SiO))	0.9253	2	13.876	5.73e-05	s(R1)	1.791	2	29.691	3.68e-08
s(log(RD5))	0.8653	2	6.746	0.00447	s(DIN)	0.7987	2	4.336	0.01795
R-sq.(adj)=0.431	Deviance explained=57%				s(log(RD5))	7.248e-06	2	0	0.9121
-REML=-70.837	Scale est.=1			n=42	s(log(SPM))	9.083e-06	2	0	0.92373
					R-sq.(adj)=0.719	Deviance explained=81%
					-REML=-39.252	Scale est.=1			n=47
Dinoflagelates
Parametric coefficients:					Parametric coefficients:
	Estimate	Std. Error	z value	Pr(>|z|)		Estimate	Std. Error	z value	Pr(>|z|)
(Intercept)	0.142643	0.005549	25.71	<2e-16	(Intercept)	0.126757	0.003374	37.57	<2e-16
Approximate significance of smooth terms:					Approximate significance of smooth terms:
	edf	Ref.df	Chi.sq	p-value		edf	Ref.df	Chi.sq	p-value
s(Tide Amplitude)	5.742e-06	2	0	0.52678	s(Water Temperature)	1.704	2	10.528	0.00182
s(Water Temperature)	0.3276	2	0.49	0.20561	s(ph)	1.847e-05	2	0	0.926898
s(sal)	3.092e-06	2	0	1	s(sal)	0.02354	2	0.024	0.309442
s(ph)	0.0002108	2	0	0.35563	s(Tide Amplitude)	0.5951	2	1.501	0.108772
s(log(DIN))	0.9145	2	2.017	0.10862	s(PO4)	2.86e-05	2	0	0.719372
s(WTD)	0.2318	2	0.308	0.24083	s(log(SiO))	1.379e-05	2	0	1
s(log(SiO))	4.544e-06	2	0	0.57126	s(R1)	1.705	2	13.177	0.000335
s(log(RD5))	1.364	2	7.425	0.00418	s(DIN)	0.8284	2	4.866	0.014055
R-sq.(adj)=0.211		Deviance explained=27.10%			s(log(RD5))	2.891e-05	2	0	0.697535
-REML=-74.241		Scale est.=1		n=42	s(log(SPM))	0.8284	2	4.855	0.014574
					R-sq.(adj)=0.442	Deviance explained=49.20%
					-REML=-99.908	Scale est.=1			n=47
Prasinophyta
					Parametric coefficients:
						Estimate	Std. Error	z value	Pr(>|z|)
					(Intercept)	0.192323	0.009309	20.66	<2e-16
					Approximate significance of smooth terms:
						edf	Ref.df	Chi.sq	p-value
					s(Water Temperature)	0.002894	2	0.003	0.280412
					s(ph)	0.5212	2	1.087	0.141555
					s(sal)	0.4381	2	0.816	0.165537
					s(Tide Amplitude)	1.531	2	8.629	0.003599
					s(PO4)	0.9032	2	9.637	0.000692
					s(log(SiO))	2.711e-05	2	0	0.423788
					s(R1)	0.9887	2	4.563	0.01822
					s(DIN)	2.709e-05	2	0	0.546511
					s(log(RD5))	0.6092	2	1.386	0.122458
					s(log(SPM))	2.052e-05	2	0	0.997616
					R-sq.(adj)=0.327	Deviance explained=42.70%
					-REML=-55.185	Scale est.=1			n=47
