# Supplementary material for: Tidal and Physicochemical Effects on Phytoplankton Community Variability at Tagus Estuary (Portugal)
Source: Frontiers journal article supplement (doi:10.3389/fmars.2021.675699), 2021-07-07
Supplement: Image_2.pdf [file Image_2.pdf]

Diatoms

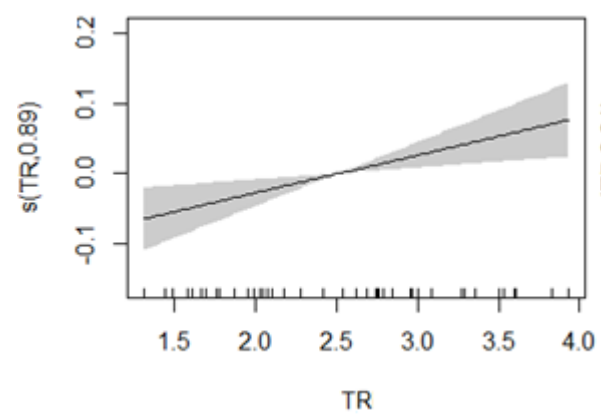

Cryptophytes

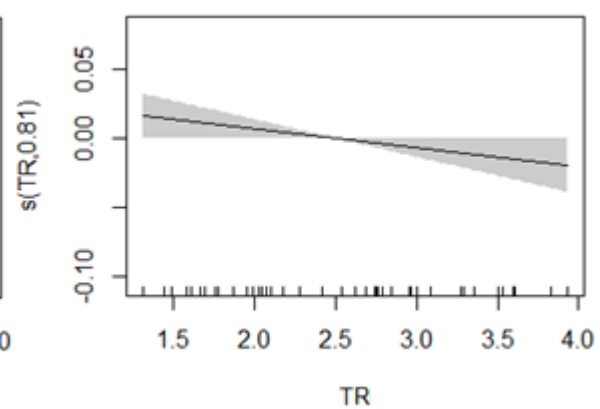

Dinoflagellates

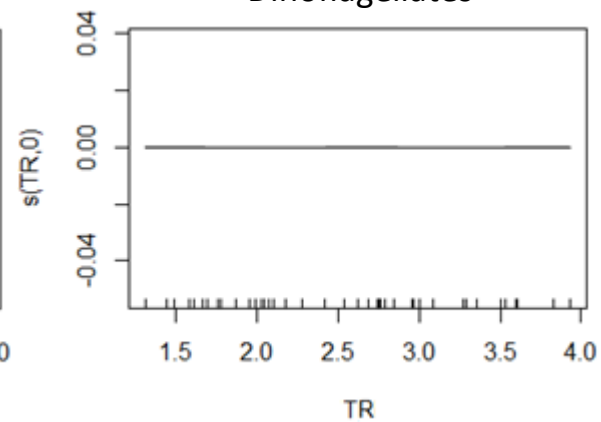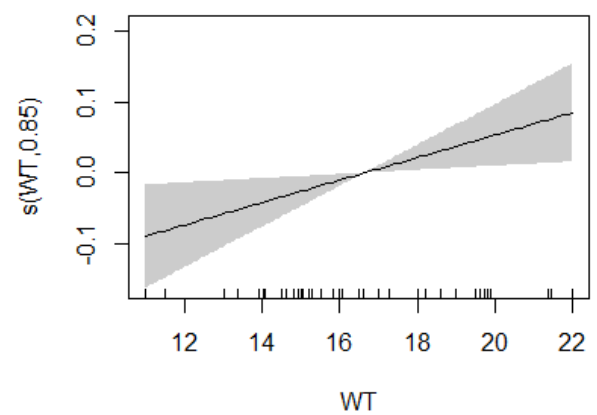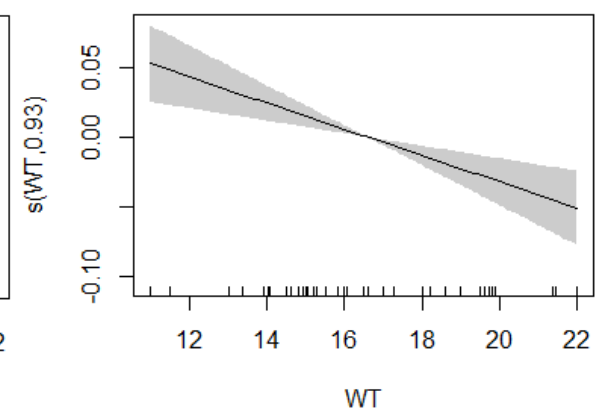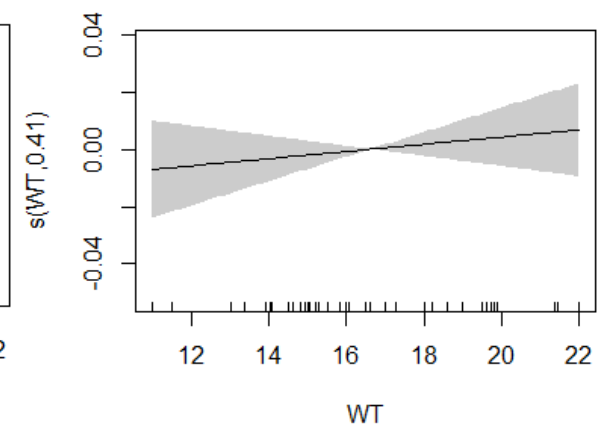

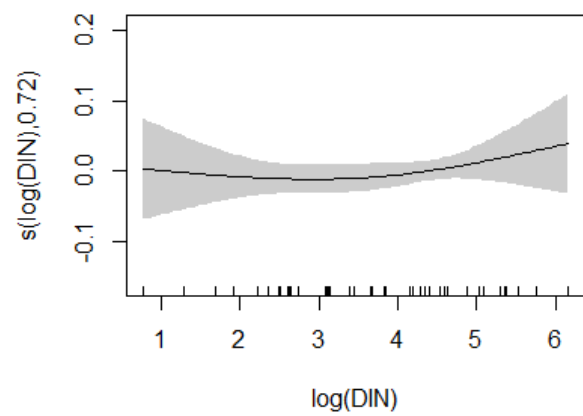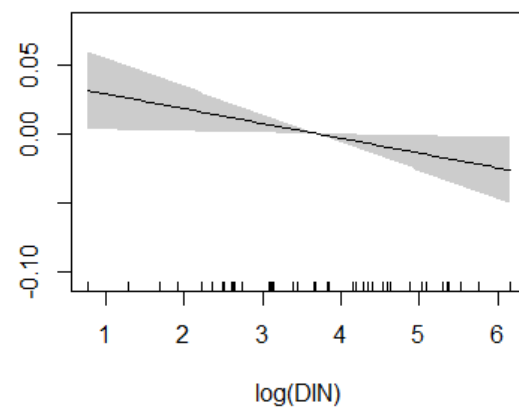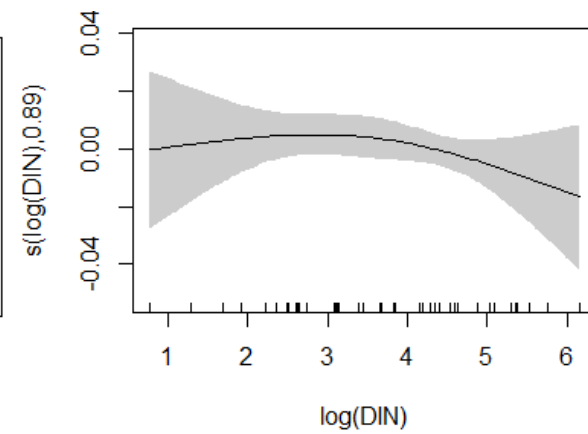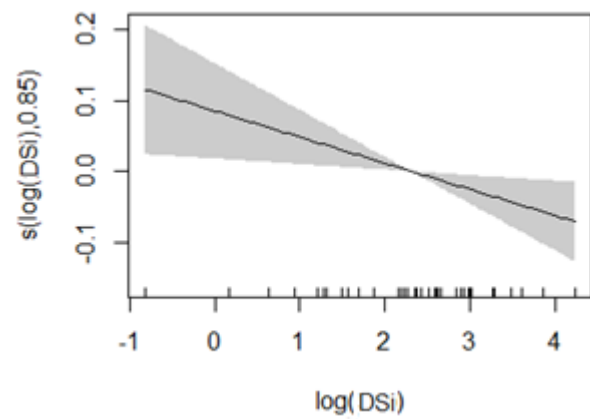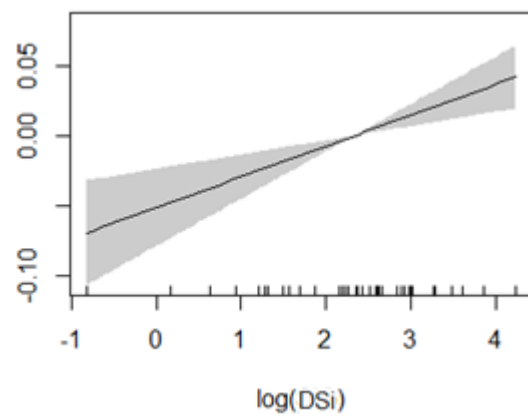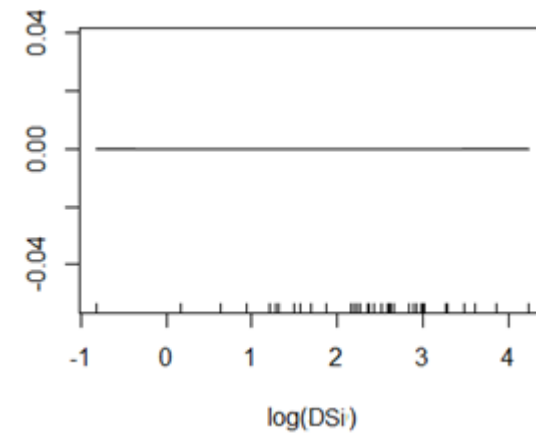

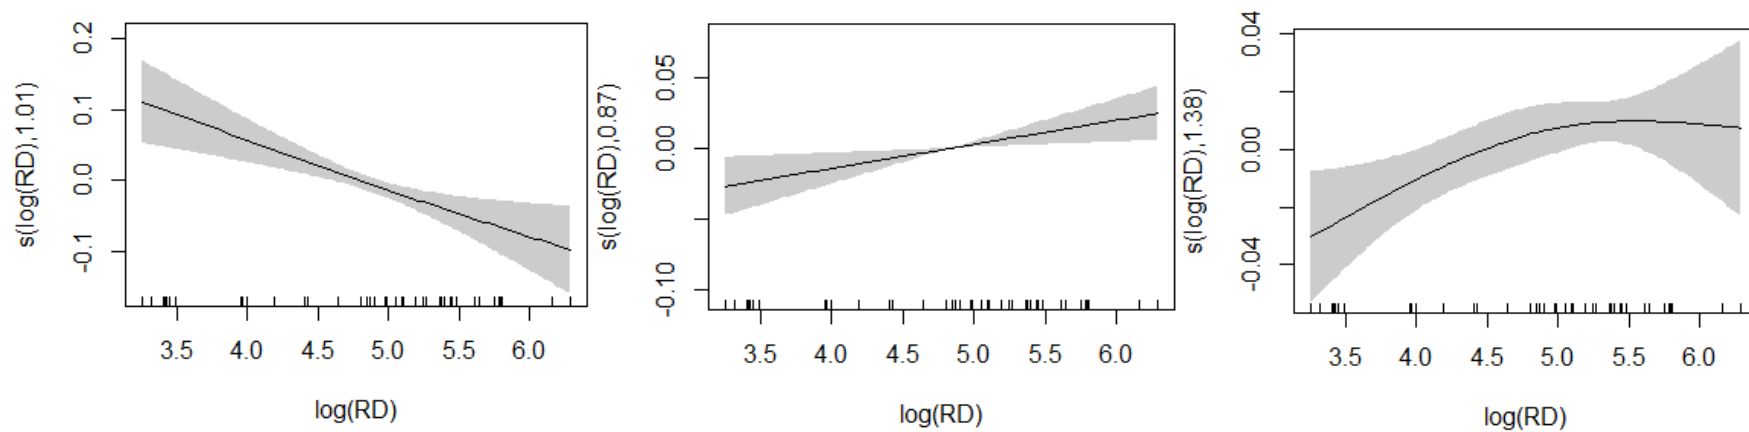

Figure SM 2 (continues on next page) – Generalized Additive models relation between each descriptor variable and Diatoms, Cryptophytes and Dinoflagellates with the descriptor variables in Alcântara. For easier interpretation of the relation between each group response, graphs are presented according to which descriptors were significant to Diatoms, which had the most significant descriptors. The parameters are presented as follows: water temperature (WT), pH, Salinity (Sal), tidal range (TR), orthophosphate concentration (DIP), silicate concentration (DSi), daily mean radiation (R1), dissolved inorganic nitrogen (DIN) and River discharge (RD).

Diatoms

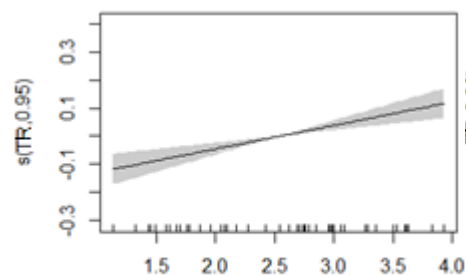

Cryptophytes

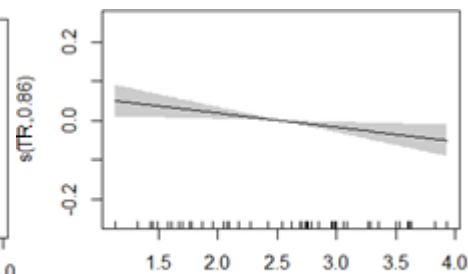

Dinoflagellates

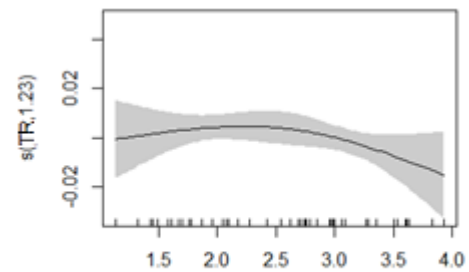

Prasinophytes

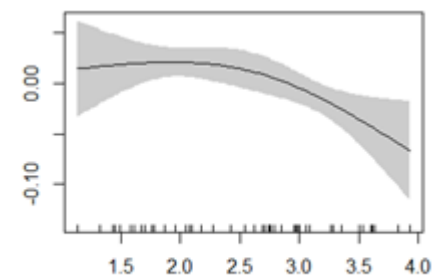

TR

TR

TR

TR

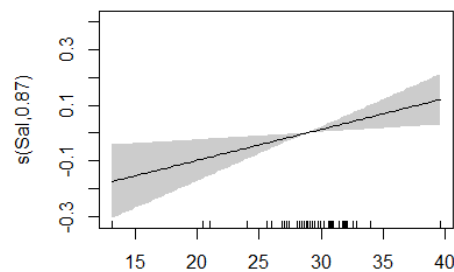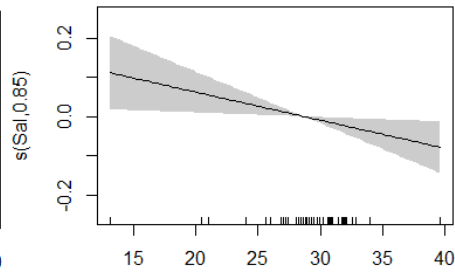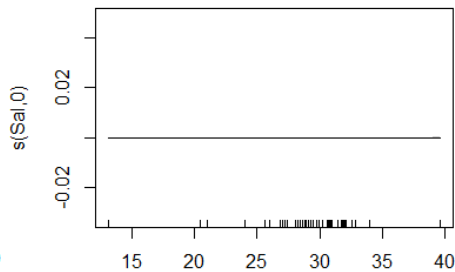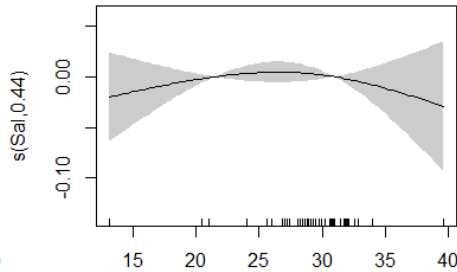

Sal

Sal

Sal

Sal

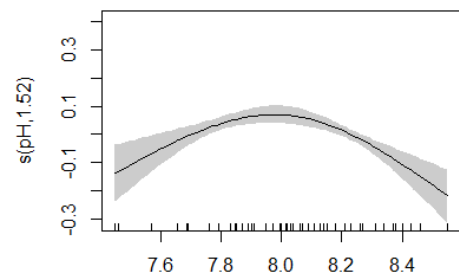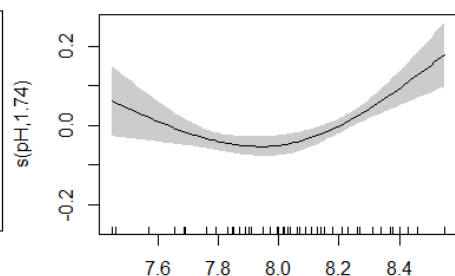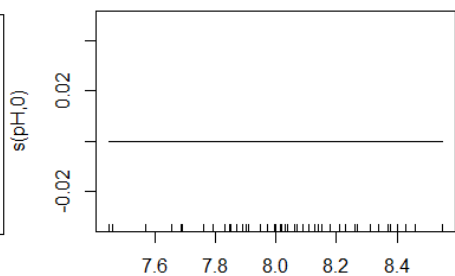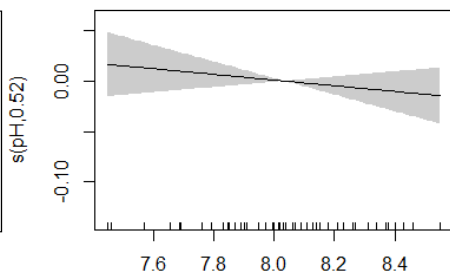

pH

pH

pH

pH

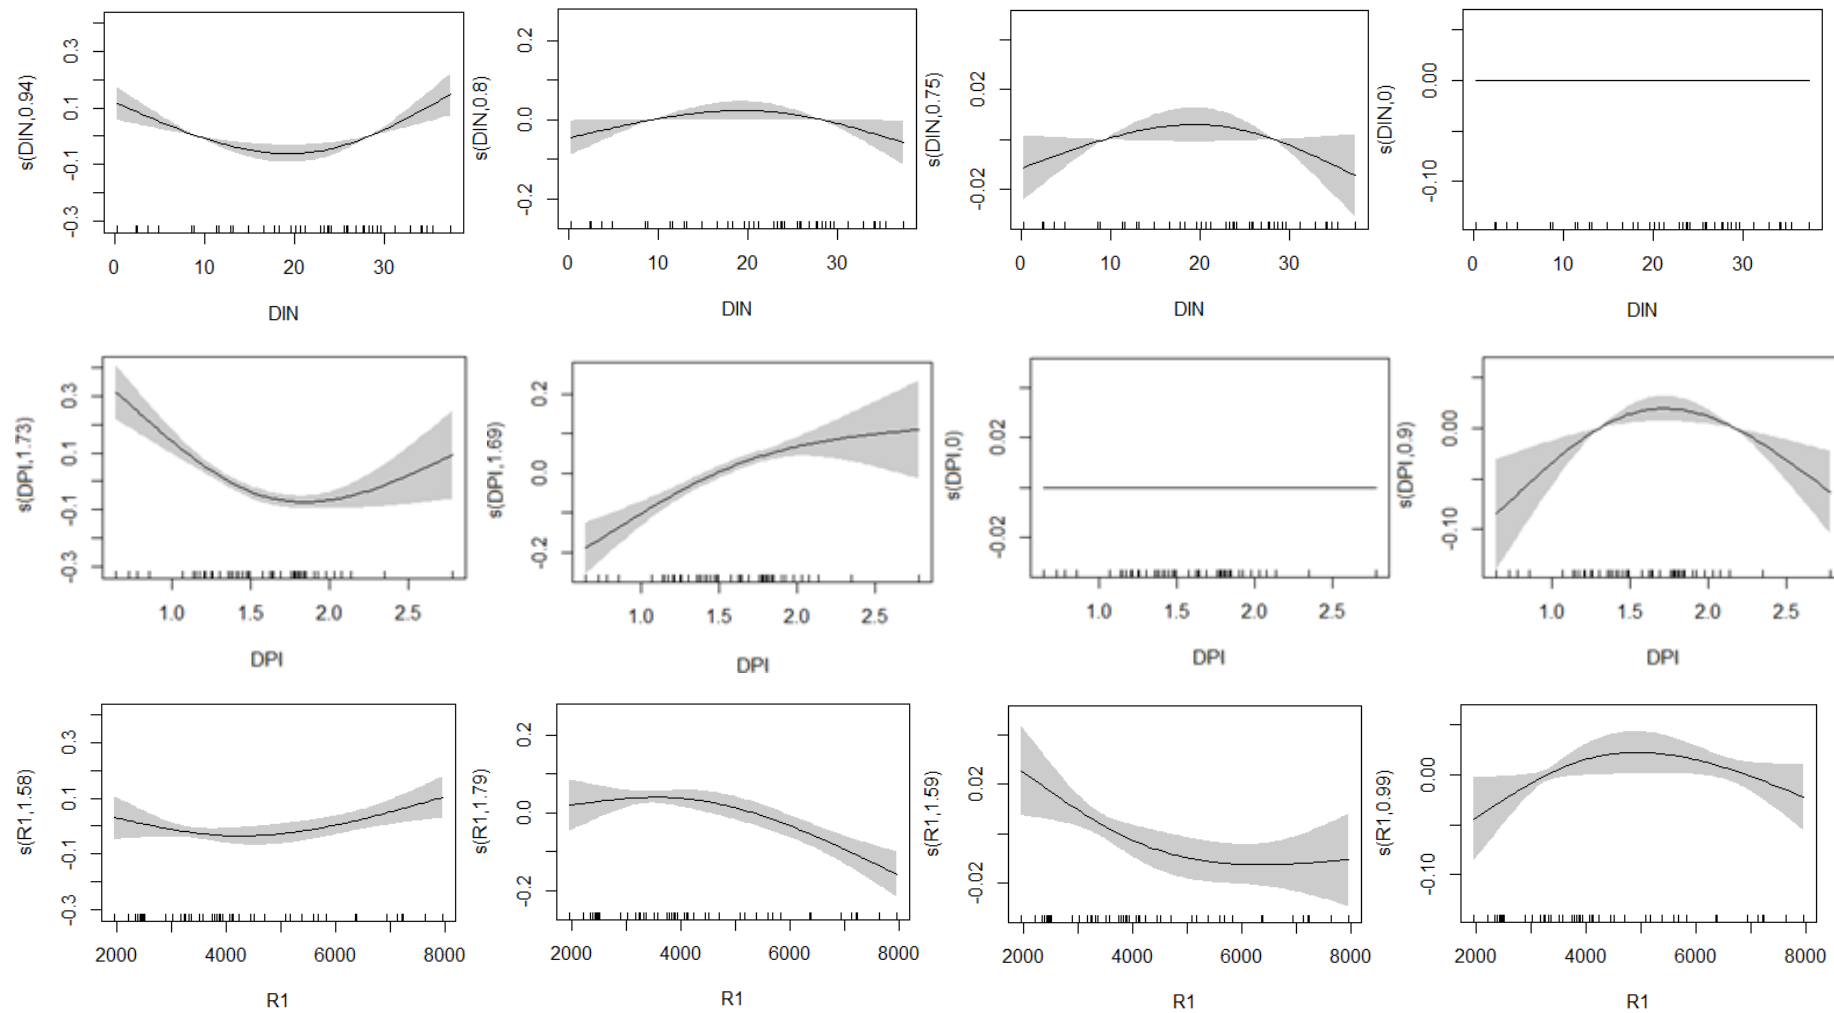

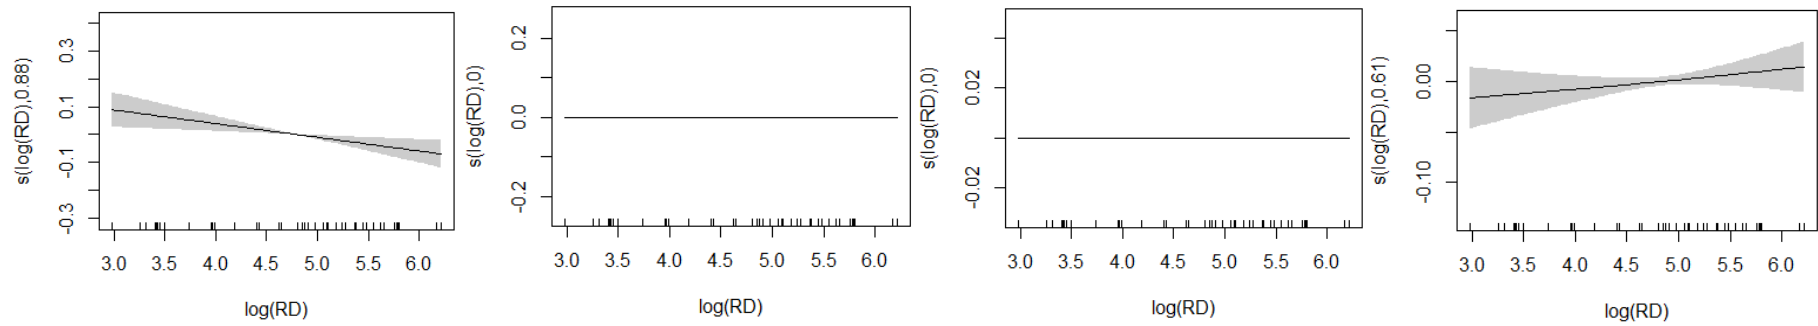

Figure SM 2 (continuation) – Generalized Additive models relation between each descriptor variable and both Diatoms, Cryptophytes, Dinoflagellates and Prasinophytes in Barreiro. For easier interpretation of the relation between each group response, graphs are presented according to which descriptors were significant to Diatoms, which had the most significant descriptors. The parameters are presented as follows: water temperature (WT), pH, Salinity (Sal), tidal range (TR), orthophosphate concentration (DIP), silicate concentration (DSi), daily mean radiation (R1), dissolved inorganic nitrogen (DIN) and River discharge (RD).
